# Supplementary material
Source: PubMed Central journal article supplement (PMC4035915)
Supplement: 1323964111_pnas.201323964SI.pdf [file 1323964111_pnas.201323964SI.pdf]

# Supporting Information

Larson et al. 10.1073/pnas.1323964111

## SI Text

**Information Related to Fig. 1.** Each of the eight macroregions listed below correspond with the named regions in Fig. 2. The regions are then subdivided into the subregions represented on the map in Fig. 1. The references following each region name represent key recent studies and good starting points and are not meant to be comprehensive. In addition to these references, we are indebted to a large volume of older, prominent, and foundational literature on early agriculture around the world (1–22). For each region, a list of key domesticates is given, followed by selected references in which more extensive literature sources can be found. Importantly, not all of the crops listed in each region were taken under cultivation and domesticated simultaneously.

**North America.** 1. Eastern North America (middle Holocene): squash (*Cucurbita pepo* ssp. *ovifera* var. *ovifera*), sunflower (*Helianthus annuus*), pitseed goosefoot (*Chenopodium berlandieri*), marshelder (*Iva annua*). Few of these crops become global crops. Larger scale agriculture developed later with the diffusion of maize (from Mesoamerica, below) (23, 24).

**Mesoamerica.** 2. Mesoamerica, lowlands and highlands (early Holocene): maize (*Zea mays*), common bean (*Phaseolus vulgaris*), sieva lima bean (*Phaseolus lunatus*), squashes (*Cucurbita pepo* ssp. *pepo*, *C. argyrosperma*), avocado (*Persea americana*), chili pepper (*Capsicum annuum*), Guaje tree bean (*Leucaena esculenta*), hogplum (*Spondias mombin*), jicama (*Pachyrhizus erosus*), chayote (*Sechium edule*) (25–31).

**South America.** 3. Northern Lowland South America (early Holocene): squash (*Cucurbita moschata*), leren (*Calathea allouia*), achira (*Canna edulis*), cocoyam (*Xanthosoma sagittifolium*), sweet potato (*Ipomoea batatas*). The extent of early cultural connections or differences with Northwestern Lowland South America (Northwestern Lowland South America, below) deserves further investigation, but independent origins of cultivation in one or both of these areas in the early Holocene is widely accepted (28, 32, 33).

4. Northwestern Lowland South America (early Holocene): squash (*Cucurbita ecuadorensis*), sea island cotton (*Gossypium barbadense*), jackbean (*Canavalia ensiformis*), cocoa (*Theobroma cacao*). The extent of early cultural connections or differences with Northern Lowland South America (above) deserves further investigation, but independent origins of cultivation in one or both of these areas in the early Holocene is widely accepted (28, 32, 34–36).

5. Central/Southern Andes (middle Holocene on current evidence): potato (*Solanum tuberosum*), quinoa (*Chenopodium quinoa*), Andean grain amaranth (*Amaranthus caudatus*), oca (*Oxalis tuberosa*), Ulluco (*Ullucus tuberosus*), common bean (*Phaseolus vulgaris*), lima bean (*Phaseolus lunatus*) (probably northern Andes), squash (*Cucurbita ficifolia*), guinea pig (*Cavia porcellus*), llama (*Lama glama*), alpaca (*Vicugna pacos*) (11, 37–39).

6. Southwestern Amazonia: manioc (*Manihot esculenta*), peanut (*Arachis hypogaea*), peach palm (*Bactris gasipaes*), chilis (*Capsicum baccatum*, *Capsicum chinense*), squash (*Cucurbita maxima*). Although the domestication processes in this region have not yet been documented archaeobotanically, some crops that originated here diffused to other regions in the early Holocene, suggesting that early Holocene evidence should be sought in this region (28, 32, 40–42).

**Africa.** 7. West African Savannah/Sahel (middle Holocene): pearl millet (*Pennisetum glaucum*), fonio (*Digitaria exilis*), black fonio (*Brachiaria deflexa*), African rice (*Oryza glaberrima*), cowpea (*Vigna unguiculata*), bambara groundnut (*Vigna subterranea*), baobab tree (*Adansonia digitata*), kenaf (*Hibiscus cannabinus*). Pastoralism based on cattle, sheep, and goat may have arrived before plant cultivation in this region, but there is no evidence for introduced crop cultivars (43–45).

8. West African tropical forest: oil palm (*Elaeis guineensis*), African yam (*Dioscorea cayenensis*), hausa potato (*Plectranthus rotundifolius*), dazo (*Plectranthus esculentus*), kola nut (*Cola nitida*, *Cola acuminata*). Historical linguistic evidence points to tree crops and tubers being important before the introduction of savannah cereals, like millet, although processes of diffusion of pearl millet from the north (from West African Savannah) are clear from archaeology (43, 45–48).

9. Sudanic Savannah (probably middle Holocene): sorghum (*Sorghum bicolor*), hyacinth bean (*Lablab purpureus*), roselle (*Hibiscus sabdariffa*), donkey (*Equus asinus*), African cattle (*Bos africanus*). African cattle likely result from introgression from a native African *Bos* into West Asian *Bos taurus*. Plant domestication processes are poorly documented in this zone (43, 45, 49).

10. Ethiopian plateau (probably middle Holocene): tef (*Eragrostis tef*), finger millet (*Eleusine coracana*), Ethiopian oat (*Avena abyssinica*), enset (*Ensete ventricosum*), yam (*Dioscorea cayenensis*), Ethiopian pea (*Pisum abyssinicum*), achote (*Coccinia abyssinica*), noog (*Guizotia abyssinica*), coffee (*Coffea arabica*). Historical linguistic evidence points to enset and tubers being important in the southwest of Ethiopia before the introduction of northern plateau cereals, like tef or finger millet. It is plausible that pastoralism and sorghum cultivation was first introduced from the Sudanic savannahs (above). Archaeobotanical and archaeozoological evidence are largely lacking in this zone (45, 50–52).

**Southwest Asia.** 11. Fertile Crescent (early Holocene): wheats (*Triticum* spp.), barley (*Hordeum vulgare*), lentil (*Lens culinaris*), pea (*Pisum sativum*), chickpea (*Cicer arietinum*), broadbean (*Vicia faba*), flax (*Linum usitatissimum*), sheep (*Ovis aries*), goat (*Capra hircus*), taurine cattle (*Bos taurus*), pig (*Sus scrofa*), cat (*Felis domesticus*) (53–57).

**South Asia.** 12. Savannahs of Western India (middle Holocene): water buffalo (*Bubalus bubalis*), chicken (*Gallus gallus*), little millet (*Panicum sumatrense*), sesame (*Sesamum indicum*), urd bean (*Vigna mungo*), horsegram (*Macrotyloma uniflorum*) and mungbean (*Vigna radiata*), melon (*Cucumis melo*). These domestications may postdate the arrival of domesticated animals, wheat and barley in the Indus region to the west, and thereby derive inspiration from West Asia (Fertile Crescent, above) (58–60).

13. South India (middle Holocene): browntop millet (*Brachiaria ramosa*), mungbean (*Vigna radiata*), horsegram (*Macrotyloma uniflorum*). The crop domestications may occur after the arrival of sheep/goat, cattle, but appear to precede introduced crops.

14. Ganges and eastern Indian plains: rice (*Oryza sativa* ssp.), sawa millet, pigeonpea (*Cajanus cajan*), cucumber (*Cucumis sativus*), and numerous cucurbits (*Luffa* spp., *Momordica charantia*, *Praecitrullus fistulosus*, *Trichosanthes cucumerina*, *Coccinia grandis*) (58, 59).

**East Asia.** 15. Chinese loess plateau (early Holocene): broomcorn millet (*Panicum miliaceum*), foxtail millet (*Setaria italica*), soybean (*Glycine max*), hemp (*Cannabis sativa*), peach (*Amygdalus*

*persicus*), apricot (*Armeniaca vulgaris*), pig (*Sus scrofa*). Some authors regard these regions as incorporating multiple independent centers of millet domestication (61–66).

16. Western Yunnan/Eastern Tibet: buckwheats (*Fagopyrum esculentum* and *Fagopyrum tartaricum*), yak (*Bos grunniens*), inferred from wild progenitor ranges. Possibly secondary domestications under influence of millets from Chinese loess plateau (above) (63, 67–70).

17. Lower-Middle Yangtze (middle Holocene): rice (*Oryza sativa* spp. *japonica*), ramie (*Boehmeria nivea*), silkworm (*Bombyx mori*), melon (*Cucumis melo*), pig (*Sus scrofa*). Some authors have argued for early cultural connections between early millet cultivators in Chinese loess plateau and the early rice cultivators in Lower-Middle Yangtze (62, 63, 66, 71).

18. Lingnan (tropical south China): yams (*Dioscorea* spp.), taro (*Colocasia esculenta*), sago palms (*Metroxylon sagu*), ducks (*Anas platyrhynchos*), Asian geese (*Anser anser*). Evidence for vegetative cultural crops has been found from the middle Holocene before the arrival of rice, although evidence for cultivation is ambiguous

and could be regarded as inspired by earlier rice cultivation to the north (66, 72–74).

19. Japanese islands (middle Holocene): barnyard millet (*Echinochloa utilis*), azuki bean (*Vigna angularis*), soybean (*Glycine max*), Perilla (*Perilla frutescens*), burdock (*Arctium lappa*). Few of these crops became global crops, and soybean was separately domesticated in China. Larger scale agriculture developed later with the diffusion of rice and millets from China (from Chinese loess plateau and Lower-Middle Yangtze, above) (75–77).

**New Guinea.** 20. New Guinea (middle Holocene): banana (*Musa acuminata*), taro (*Colocasia esculenta*), giant taro (*Alocasia macrorrhiza*), breadfruit (*Artocarpus altilis*), yams (*Dioscorea* spp.), sago (*Metroxylon sagu*), sugarcane (*Saccharum officinarum*). Exploitation of some of these species is documented back to the early Holocene, although unambiguous evidence for cultivation systems is present only in the middle Holocene from the highlands. Archaeologically documenting morphological changes associated with domestication in many of these species has proven difficult (78–80).

- Anderson E (1954) *Plants, Man and Life* (Melrose, London).
- Ford RI (1978) *The Nature and Status of Ethnobotany* (Museum of Anthropology, Univ of Michigan, Ann Arbor, MI).
- Watson PJ, Kennedy MC (1991) The development of horticulture in the Eastern Woodlands of North America: Women's role. *Engendering Archaeology: Women and Prehistory*, eds Gero J, Conkey M (Basil Blackwell, Oxford), pp 255–275.
- Cohen MN (1977) *The Food Crisis in Prehistory. Overpopulation and the Origins of Agriculture* (Yale Univ Press, New Haven).
- Watson PJ (1991) Origins of food production in Western Asia and Eastern North America. *Quaternary Landscapes*, eds Shane L, Cushing E (Univ of Minnesota Press, Minneapolis), pp 1–37.
- Harlan JR, Wet JMJ (1976) *Origins of African Plant Domestication*, ed Stemler A (Walter de Gruyter, The Hague).
- MacNeish RS (1967–1972) *The Prehistory of the Tehuacan Valley, vols. 1–5* (Univ of Texas Press, Austin, TX).
- Flannery KV (1973) The origins of agriculture. *Annu Rev Anthropol* 2:271–310.
- Flannery KV, ed (1986) *Guila Naquitz: Archaic Foraging and Early Agriculture in Oaxaca, Mexico* (Academic, New York).
- Harlan JR (1971) Agricultural origins: Centers and noncenters. *Science* 174(4008):468–474.
- Kaplan L, Lynch TF (1999) *Phaseolus* (fabaceae) in archaeology: AMS radiocarbon dates and their significance for pre-Columbian agriculture. *Econ Bot* 53(3):261–272.
- Rindos D (1984) *The Origins of Agriculture: An Evolutionary Perspective* (Academic, Orlando, FL).
- Sauer CO (1952) *Agricultural Origins and Dispersals* (American Geographical Society, New York).
- Sauer CO (1950) Cultivated plants of South and central America. *Handbook of South American Indians*, ed Steward J (Bureau of American Ethnology, Bulletin 143, US Government Printing Office, Washington, DC), Vol 6, pp 487–543.
- Mangelsdorf P (1953) Review of agricultural origins and dispersals. *Am Antiq* 19:87–90.
- Stothert K (1985) The preceramic Las Vegas culture of coastal Ecuador. *Am Antiq* 50:613–637.
- Harris DR (1972) The origins of agriculture in the tropics. *Am Sci* 60:180–193.
- Harris DR, Hillman GC (1989) *Foraging and Farming: The Evolution of Plant Exploitation* (Unwin Hyman, London).
- Pearsall DM (1978) Phytolith analysis of archeological soils: Evidence for maize cultivation in formative Ecuador. *Science* 199(4325):177–178.
- Ucko PJ (1969) *The Domestication and Exploitation of Plants and Animals*, ed Dimbleby GW (Gerald Duckworth, Chicago).
- Zohary D (1954) Unconscious selection and the evolution of domesticated plants. *Econ Bot* 58(1):5–10.
- Zohary D, Hopf M (1988) *Domestication of Plants in the Old World* (Oxford Univ Press, Oxford).
- Smith BD, Cowan CW, Hoffman MP (2007) *Rivers of Change: Essays on Early Agriculture in Eastern North America* (Univ of Alabama Press, Tuscaloosa, Alabama).
- Smith BD (2006) Eastern North America as an independent center of plant domestication. *Proc Natl Acad Sci USA* 103(33):12223–12228.
- Hughes CE, et al. (2007) Serendipitous backyard hybridization and the origin of crops. *Proc Natl Acad Sci USA* 104(36):14389–14394.
- Kwak M, Kami JA, Gepts P (2009) The putative Mesoamerican domestication center of is located in the Lerma-Santiago Basin of Mexico. *Crop Sci* 49(2):554–563.
- Piperno DR, Ranere AJ, Holst I, Iriarte J, Dickau R (2009) Starch grain and phytolith evidence for early ninth millennium B.P. maize from the Central Balsas River Valley, Mexico. *Proc Natl Acad Sci USA* 106(13):5019–5024.
- Piperno DR (2011) The origins of plant cultivation and domestication in the New World tropics. *Curr Anthropol* 52(54):S453–S470.
- Smith BD (1997) The initial domestication of *Cucurbita pepo* in the Americas 10,000 years ago. *Science* 276(5314):932–934.
- van Heerwaarden J, et al. (2011) Genetic signals of origin, spread, and introgression in a large sample of maize landraces. *Proc Natl Acad Sci USA* 108(3):1088–1092.
- Zizumbo-Villareal D, Colunga-GarcíaMarín P (2010) Origin of agriculture and plant domestication in West Mesoamerica. *Genet Resour Crop Evol* 57(6):813–825.
- Clement CR, de Cristo-Araújo M, Coppens D'Eeckenbrugge G, Alves Pereira A, Picanço-Rodrigues D (2010) Origin and domestication of native Amazonian crops. *Diversity* 2(1):72–106.
- Roullier C, et al. (2013) Disentangling the origins of cultivated sweet potato (*Ipomoea batatas* (L.) Lam.). *PLoS ONE* 8(5):e62707.
- Dillehay TD, et al. (2010) Early Holocene coca chewing in northern Peru. *Antiquity* 84(326):939–953.
- Thomas E, et al. (2012) Present spatial diversity patterns of *Theobroma cacao* L. in the neotropics reflect genetic differentiation in pleistocene refugia followed by human-influenced dispersal. *PLoS ONE* 7(10):e47676.
- Westengen OT, Huamán Z, Heun M (2005) Genetic diversity and geographic pattern in early South American cotton domestication. *Theor Appl Genet* 110(2):392–402.
- Kwak M, Gepts P (2009) Structure of genetic diversity in the two major gene pools of common bean (*Phaseolus vulgaris* L., Fabaceae). *Theor Appl Genet* 118(5):979–992.
- Mengoni Goñalons GL, Yacobaccio H (2006) The domestication of South American camelids: A view from the South-Central Andes. *Documenting Domestication: New Genetic and Archaeological Paradigms*, eds Zeder M, Bradley D, Emshwiller E, Smith B (Univ of California Press, Berkeley, CA), pp 228–244.
- Pearsall DM (2008) Plant domestication and the shift to agriculture in the Andes. *The Handbook of South American Archaeology*, eds Silverman H, Isbell WH (Springer, New York), pp 105–120.
- da Cunha FB, et al. (2008) Genetic relationships among *Arachis hypogaea* L. (AABB) and diploid *Arachis* species with AA and BB genomes. *Genet Resour Crop Evol* 55(1):15–20.
- Olsen KM, Schaala BA (1999) Evidence on the origin of cassava: Phylogeography of *Manihot esculenta*. *Proc Natl Acad Sci USA* 96(10):5586–5591.
- Perry L, et al. (2007) Starch fossils and the domestication and dispersal of chili peppers (*Capsicum* spp. L.) in the Americas. *Science* 315(5814):986–988.
- Harlan JR (1992) Indigenous African agriculture. *The Origins of Agriculture*, eds Cowan CW, Watson PJ (Smithsonian Institution, Washington), pp 59–70.
- Manning K, Pelling R, Higham T, Schwenniger J-L, Fuller DQ (2011) 4500-Year old domesticated pearl millet *Pennisetum glaucum* from the Tilemsi Valley, Mali: New insights into an alternative cereal domestication pathway. *J Archaeol Sci* 38(2):312–322.
- Fuller DQ, Hildebrand L (2013) Domesticating Plants in Africa. *The Oxford Handbook of African Archaeology*, eds Mitchell P, Lane P (Oxford Univ Press, Oxford), pp 507–525.
- D'Andrea AC, Logan AL, Watson DJ (2006) Oil palm and prehistoric subsistence in tropical West Africa. *J African Archaeol* 4(2):195–222.
- Neumann K, et al. (2012) First farmers in the Central African rainforest: A view from southern Cameroon. *Quat Int* 249:53–62.
- Williamson K (1993) Linguistic evidence for the use of tree and tuber food plants. *The Archeology of Africa: Food, Metals and Towns*, eds Shaw T, Sinclair P, Andah B, Okpoko A (Routledge, London), pp 139–153.
- Marshall F, Weissbrod L (2011) Domestication processes and morphological change. *Curr Anthropol* 52(54):S397–S413.
- D'Andrea AC (2008) T'ef (*Eragrostis tef*) in ancient agricultural systems of highland Ethiopia. *Econ Bot* 62(4):547–566.
- Ehret C (2011) A linguistic history of cultivation and herding in northeastern Africa. *Windows on the African Past: Current Approaches to African Archaeobotany*, eds Fahmy AG, Kahlheber S, D'Andrea AC (Africa Magna, Frankfurt am Main), pp 185–208.

52. Engels JMM, Hawkes JG (1991) The Ethiopian gene center and its genetic diversity. *Plant Genetic Resources of Ethiopia*, eds Engles JMM, Hawkes JG, Worede M (Cambridge Univ Press, Cambridge), pp 23–41.
53. Asouti E, Fuller DQ (2013) A contextual approach to the emergence of agriculture in Southwest Asia. *Curr Anthropol* 54(3):299–345.
54. Fuller DQ, Willcox G, Allaby RG (2011) Cultivation and domestication had multiple origins: Arguments against the core area hypothesis for the origins of agriculture in the Near East. *World Archaeol* 43(4):628–652.
55. Conolly J, et al. (2011) Meta-analysis of zooarchaeological data from SW Asia and SE Europe provides insight into the origins and spread of animal husbandry. *J Archaeol Sci* 38(3):538–545.
56. Willcox G, Stordeur D (2012) Large-scale cereal processing before domestication during the tenth millennium cal BC in northern Syria. *Antiquity* 86(331):99–114.
57. Willcox G (2004) Measuring grain size and identifying Near Eastern cereal domestication: Evidence from the Euphrates valley. *J Archaeol Sci* 31(2):145–150.
58. Fuller DQ (2011) Finding plant domestication in the Indian subcontinent. *Curr Anthropol* 52(5):S347–S362.
59. Fuller DQ (2006) Agricultural origins and frontiers in South Asia: A working synthesis. *J World Prehist* 20(1):1–86.
60. Meadow R, Patel AK (2003) Prehistoric pastoralism in Northwestern South Asia from the Neolithic through the Harappan period. *Indus Ethnobiology. New Perspectives from the Field*, eds Weber S, Belcher W (Lexington Books, Lanham, Maryland), pp 65–94.
61. Bettinger R, Barton L, Morgan C (2010) The origins of food production in North China: A different kind of agricultural revolution. *Evol Anthropol* 19:9–21.
62. Cohen DJ (2011) The beginnings of agriculture in China. *Curr Anthropol* 52(5):S273–S293.
63. Fuller DQ (2011) Pathways to Asian civilizations: Tracing the origins and spread of rice and rice cultures. *Rice* 4:78–92.
64. Lee G-A, Crawford GW, Liu L, Sasaki Y, Chen X (2011) Archaeological soybean (*Glycine max*) in East Asia: Does size matter? *PLoS ONE* 6(11):e26720.
65. Yang X, et al. (2012) Early millet use in northern China. *Proc Natl Acad Sci USA* 109(10):3726–3730.
66. Zhao Z (2011) New archaeobotanical data for the study of the origins of agriculture in China. *Curr Anthropol* 52(5):S295–S306.
67. Guedes JdA (2011) Millets, rice, social complexity, and the spread of agriculture to the Chengdu Plain and Southwest China. *Rice* 4(3–4):104–113.
68. Guedes JdA, et al. (2013) Moving agriculture onto the Tibetan plateau: The archaeobotanical evidence. *Archaeol Anthropol Sci* 1–15.
69. Guo SC, et al. (2006) Origin of mitochondrial DNA diversity of domestic yaks. *BMC Evol Biol* 6:73.
70. Ohnishi O, Konishi T (2001) Cultivated and wild buckwheat species in eastern Tibet. *Fagopyrum* 18:3–8.
71. Fuller DQ, Qin L (2010) Declining oaks, increasing artistry, and cultivating rice: The environmental and social context of the emergence of farming in the Lower Yangtze Region. *Environ Archaeol* 15(2):139–159.
72. Hui-Lin L (1970) The origin of cultivated plants in Southeast Asia. *Econ Bot* 24(1):3–19.
73. Yang X, et al. (2013) Sago-type palms were an important plant food prior to rice in southern subtropical China. *PLoS ONE* 8(5):e63148.
74. Chi Z, Hung H-c (2012) Later hunter-gatherers in southern China, 18 000–3000 BC. *Antiquity* 86(331):11–29.
75. Crawford GW (2011) Advances in understanding early agriculture in Japan. *Curr Anthropol* 52(5):S331–S345.
76. Matsui A, Kanehara M (2006) The question of prehistoric plant husbandry during the Jomon period in Japan. *World Archaeol* 38(2):259–273.
77. Obata H (2011) *Archaeoethnobotany in North-East Asia and Agriculture in the Jomon* (Doshisha, Tokyo).
78. Lebot V (1999) Biomolecular evidence for plant domestication in Sahul. *Genet Resour Crop Evol* 46(6):619–628.
79. Denham TP, et al. (2003) Origins of agriculture at Kuk Swamp in the highlands of New Guinea. *Science* 301(5630):189–193.
80. Denham T (2011) Early agriculture and plant domestication in New Guinea and Island Southeast Asia. *Curr Anthropol* 52(5):S379–S395.

**Table S1. Additional details and references to support the table shown in Fig. 2**

| Region/taxa              | Exploitation before domestication |        | Management and predomestication cultivation |        | Domestication change |        | Sources            |
|--------------------------|-----------------------------------|--------|---------------------------------------------|--------|----------------------|--------|--------------------|
|                          | Start                             | Finish | Start                                       | Finish | Start                | Finish |                    |
| <b>Southwest Asia</b>    |                                   |        |                                             |        |                      |        |                    |
| Wheat                    | 12,000                            | 11,250 | 11,250                                      | 11,000 | 11,000               | 9,000  | (1–3)              |
| Barley                   | 12,000                            | 11,250 | 11,250                                      | 10,500 | 10,500               | 9,000  | (1–3)              |
| Lentil                   | 12,000                            | 11,000 | 11,000                                      | 10,500 | 10,500               | 9,000  | (1, 3)             |
| Pea                      | 11,500                            | 11,000 | 11,000                                      | 10,000 | 10,000               | 8,500  | (1, 3)             |
| Chickpea                 | 11,000                            | 10,500 | 10,500                                      | 10,250 | 10,250               | 8,250  | (1, 3, 4)          |
| Broadbean                | x                                 | x      | x                                           | x      | 10,500               |        | (1, 4)             |
| Flax                     | 12,000                            | 9,500  | x                                           | x      | 9,500                |        | (1, 5)             |
| Olive                    | 10,000                            | 6,000  | x                                           | x      | 6,000                |        | (6)                |
| Sheep                    | 12,000                            | 10,500 | 10,500                                      | 9,750  | 9,750                | 8,000  | (7–12)             |
| Goat                     | 12,000                            | 10,500 | 10,500                                      | 9,750  | 9,750                | 8,000  | (7–13)             |
| Pig                      | 12,000                            | 11,500 | 11,500                                      | 9,750  | 10,250               | 9,000  | (9, 10, 12, 14)    |
| Cattle, taurine          | 11,500                            | 10,500 | 10,500                                      | 10,250 | 10,250               | 8,000  | (9, 10, 12, 14–16) |
| Cat                      | x                                 | x      | 10,500                                      | 4,000  | 4,000                |        | (17–19)            |
| <b>South Asia</b>        |                                   |        |                                             |        |                      |        |                    |
| Tree cotton              | 8,500                             | 4,500  | x                                           | x      | 4,500                |        | (20, 21)           |
| Rice ( <i>indica</i> )   | 8,000                             | 5,000  | 5,000                                       | 4,000  | 4,000                | 2,500  | (3, 22, 23)        |
| Little millet            | x                                 | x      | x                                           | x      | 4,500                |        | (23)               |
| Browntop millet          | x                                 | x      | x                                           | x      | 4,000                |        | (23)               |
| Mungbean                 | x                                 | x      | 4,500                                       | 3,500  | 3,500                | 3,000  | (3, 23)            |
| Pigeonpea                | x                                 | x      | x                                           | x      | 3,500                |        | (23)               |
| Zebu cattle              | 9,000                             | 8,000  | x                                           | x      | 8,000                | 6,500  | (24)               |
| Water buffalo            | 6,000                             | 4,500  | x                                           | x      | 4,500                |        | (25)               |
| <b>East Asia</b>         |                                   |        |                                             |        |                      |        |                    |
| Broomcorn millet         | 10,000                            | 8,000  | x                                           | x      | 8,000                |        | (26–28)            |
| Foxtail millet           | 11,500                            | 7,500  | x                                           | x      | 7,500                |        | (28, 29)           |
| Rice, <i>japonica</i>    | 10,000                            | 8,000  | 8,000                                       | 7,500  | 7,500                | 5,000  | (3, 22, 30)        |
| Soybean                  | 8,500                             | 5,500  | x                                           | x      | 5,500                | 3,500  | (3, 31)            |
| Ramie                    | x                                 | x      | x                                           | x      | 5,250                |        | (32, 33)           |
| Melon                    | 7,000                             | 4,000  | x                                           | x      | 4,000                | 3,500  | (3, 34)            |
| Pig                      | 12,000                            | 8,500  |                                             |        | 8,500                | 6,000  | (35, 36)           |
| Silkworm                 | 7,000                             | 5,250  | x                                           | x      | 5,250                |        | (32, 37, 38)       |
| Yak                      | x                                 | x      | x                                           | x      | 4,250                |        | (39)               |
| Horse                    | 7,500                             | 6,750  | 6,750                                       | 5,500  | 5,500                | 4,000  | (40–43)            |
| Bactrian camel           | x                                 | x      | x                                           | x      | 4,500                |        | (44–46)            |
| Duck                     | 2,500                             | 1,000  | x                                           | x      | 1,000                |        | (47, 48)           |
| Chicken                  | 6,000                             | 4,000  | x                                           | x      | 4,000                |        | (49–51)            |
| <b>New Guinea</b>        |                                   |        |                                             |        |                      |        |                    |
| Banana                   | 10,000                            | 7,000  | 7,000                                       | 4,000  | 4,000                |        | (3, 52–54)         |
| Taro                     | 10,000                            | 7,000  | 7,000                                       | 4,000  | x                    | x      | (3, 52, 53)        |
| Yam                      | 10,000                            | 7,000  | 7,000                                       | 4,000  | x                    | x      | (3, 52, 53)        |
| <b>Africa and Arabia</b> |                                   |        |                                             |        |                      |        |                    |
| Date palm                | 7,000                             | 6,000  | x                                           | x      | 5,000                |        | (55, 56)           |
| Sorghum                  | 8,000                             | 4,000  | x                                           | x      | 4,000                |        | (56, 57)           |
| Pearl millet             | x                                 | x      | x                                           | x      | 4,500                | 3,500  | (3, 58)            |
| Fonio                    | x                                 | x      | x                                           | x      | 2,500                |        | (57)               |
| Cowpea                   | x                                 | x      | x                                           | x      | 3,750                |        | (59)               |
| Hyacinth bean            | x                                 | x      | x                                           | x      | 3,750                |        | (56, 57)           |
| Rice, African            | 3,500                             | 2,000  | x                                           | x      | 2,000                |        | (57, 60)           |
| Oil palm                 | 9,250                             | 3,500  | x                                           | x      | 3,500                |        | (57, 59)           |
| Cattle, African          | x                                 | x      | 9,000                                       | 7,750  | 7,750                | 6,500  | (61–70)            |
| Donkey                   | 9,000                             | 5,500  | x                                           | x      | 5,500                | 3,500  | (71–76)            |
| Dromedary camel          | 6,500                             | 3,000  | x                                           | x      | 3,000                |        | (56, 77–82)        |
| Guinea fowl              |                                   |        | 2,500                                       | 1,500  | 1,500                |        | (83–85)            |
| <b>North America</b>     |                                   |        |                                             |        |                      |        |                    |
| Squash                   | 6,500                             | 5,000  | x                                           | x      | 5,000                |        | (3, 86, 87)        |
| Sunflower                | 6,000                             | 4,750  | x                                           | x      | 4,000                |        | (3, 86, 87)        |
| Sumpweed                 | 6,000                             | 4,500  | x                                           | x      | 4,000                |        | (3, 86, 87)        |
| Pitseed goosefoot        | 4,750                             | 3,750  | x                                           | x      | 3,750                |        | (3, 86, 87)        |

**Table S1. Cont.**

| Region/taxa                             | Exploitation before domestication |        | Management and predomestication cultivation |        | Domestication change |        | Sources       |
|-----------------------------------------|-----------------------------------|--------|---------------------------------------------|--------|----------------------|--------|---------------|
|                                         | Start                             | Finish | Start                                       | Finish | Start                | Finish |               |
| <b>Meso-America</b>                     |                                   |        |                                             |        |                      |        |               |
| Squash (pepo)                           | x                                 | x      | x                                           | x      | 10,000               | 9,500  | (3, 86, 88)   |
| Maize                                   | 10,000                            | 9,000  | x                                           | x      | 9,000                |        | (89, 90)      |
| Foxtail millet-grass                    | x                                 | x      | x                                           | x      | 6,000                | 4,000  | (91)          |
| Common bean                             | x                                 | x      | x                                           | x      | 3,000                |        | (92)          |
| Avocado                                 | x                                 | x      | x                                           | x      | 3,000                |        | (93)          |
| Chile pepper                            | x                                 | x      | x                                           | x      | 3,000                |        | (93, 94)      |
| Turkey                                  | x                                 | x      | x                                           | x      | 2,000                | x      | (95)          |
| <b>South America</b>                    |                                   |        |                                             |        |                      |        |               |
| Chili pepper                            | x                                 | x      | x                                           | x      | 6,000                |        | (96)          |
| Peanut                                  | x                                 | x      | 8,500                                       | 6,500  | 5,000                |        | (97)          |
| Cotton                                  | x                                 | x      | x                                           | x      | 6,000                |        | (97)          |
| Coca                                    | x                                 | x      | x                                           | x      | 8,000                |        | (98)          |
| Now-minor root crops (arrowroot, leren) | x                                 | x      | x                                           | x      | 9,000                |        | (99, 100)     |
| Squash (moschata)                       | x                                 | x      | x                                           | x      | 10,000               |        | (97)          |
| Common bean                             | x                                 | x      | x                                           | x      | 5,000                |        | (92)          |
| Lima bean                               | x                                 | x      | 8,250                                       | x      | 6,000                |        | (92, 101)     |
| Manioc                                  | x                                 | x      | x                                           | x      | 7,000                |        | (3, 102, 103) |
| Sweet potato                            | x                                 | x      | x                                           | x      | 5,000                |        | (104)         |
| White potato                            | 7,000                             | 4,500  | x                                           | x      | 4,500                |        | (105)         |
| Quinoa                                  | 5,000                             | x      | x                                           | x      | 3,500                |        | (106)         |
| Yam                                     | x                                 | x      | x                                           | x      | 5,500                |        | (107)         |
| Llama                                   | 10,000                            | 6,000  | x                                           | x      | 6,000                | 4,000  | (108, 109)    |
| Alpaca                                  | 10,000                            | 5,000  | x                                           | x      | 5,000                | 3,000  | (108, 109)    |
| Guinea pig                              | x                                 | x      | x                                           | x      | 5,000                | 4,000  | (110, 111)    |
| Muscovy duck                            | x                                 | x      | x                                           | x      | 4,000                | 2,000  | (112, 113)    |

Dates (in calibrated years before present) listed in each of the three categories: exploitation before domestication, management and predomestic cultivation, and phenotypic change associated with domestication have been gleaned from the literature and rounded to the nearest 250 y. Cells with an "x" indicate there is no evidence as yet available for that specific category of management or change. Where there is a date for the start time for domestication change but the finish time has been left blank, this means that the date in the start time column represents a conservative time by which the organism had been domesticated, although there is yet no evidence for size or other morphological change following domestication. In addition, the missing end dates for quinoa and lima bean reflect gaps in the archaeobotanical records of these species. Because the domestication process operates over a continuum, defining categories and break points during the process is never clear-cut. The precision of numbers provided here should therefore be interpreted as estimates based upon the best available information, and many may shift as additional archaeological and genetic evidence is collected. Finally, there remain significant uncertainties and debates regarding whether many of the plants and animals (e.g., African cattle) listed here were domesticated independently in more than one region (114). In these cases, the listed dates represent those for the earliest domestication episodes in each region, although the processes may not have been truly independent.

- Asouti E, Fuller DQ (2013) A contextual approach to the emergence of agriculture in Southwest Asia. *Curr Anthropol* 54(3):299–345.
- Tanno K-I, Willcox G (2012) Distinguishing wild and domestic wheat and barley spikelets from early Holocene sites in the Near East. *Vegetation History and Archaeobotany* 21(2):107–115.
- Fuller DQ, et al. (2014) Convergent evolution and parallelism in plant domestication revealed by an expanding archaeological record. *Proc Natl Acad Sci USA*, 10.1073/pnas.1308937110.
- Tanno K-I, Willcox G (2006) The origins of cultivation of *Cicer arietinum* L. and *Vicia faba* L.: Early finds from Tell el-Kerkh, north-west Syria, late 10th millennium BP. *Vegetation History and Archaeobotany* 15(3):197–204.
- Karg S (2011) New research on the cultural history of the useful plant *Linum usitatissimum* L. (flax), a resource for food and textiles for 8,000 years. *Vegetation History and Archaeobotany* 20(6):507–508.
- Kaniewski D, et al. (2012) Primary domestication and early uses of the emblematic olive tree: Palaeobotanical, historical and molecular evidence from the Middle East. *Biol Rev Camb Philos Soc* 87(4):885–899.
- Legge AJ (1996) The beginning of caprine domestication in Southwest Asia. *The Origins and Spread of Agriculture and Pastoralism in Eurasia*, ed Harris DR (UCL Press, London), pp 238–262.
- Arbuckle BS, Öztan A, Gülçür S (2009) The evolution of sheep and goat husbandry in central Anatolia. *Anthropozoologica* 44(1):129–157.
- Conolly J, et al. (2011) Meta-analysis of zooarchaeological data from SW Asia and SE Europe provides insight into the origins and spread of animal husbandry. *J Archaeol Sci* 38(3):538–545.
- Helmer D, Gourichon L (2008) Premières données sur les modalités de subsistance à Tell Aswad (Syrie, PPNB moyen et récent, néolithique céramique ancien) - Fouilles 2001-2005. *Archaeozoology of the Near East VIII: Actes des Huitièmes Rencontres Internationales d'Archéozoologie de l'Asie du Sud-Ouest et des Régions Adjacentes*, eds Vila E, Gourichon L, Choyke AM, Buitenhuis H (Travaux de la Maison de l'Orient et de la Méditerranée, Lyon, France), pp 119–151.
- Hongo H, Meadow RH, Oksuz B, Ilgezdi G (2005) Sheep and goat remains from Cayonu Tepesi, Southeastern Anatolia. *Archaeozoology of the Near East VI: Proceedings of the Sixth International Symposium on the Archaeozoology of Southwestern Asia and Adjacent Areas*, eds Buitenhuis H, Choyke A, Martin L, Bartosiewicz L, Mashkour M (ARC, Groningen), pp 113–124.
- Vigne JD, Carrère I, Briois F, Guilaine J (2011) The early process of mammal domestication in the Near East. *Curr Anthropol* 52(54):255–271.
- Zeder MA (2005) New perspectives on livestock domestication in the Fertile Crescent as viewed from the Zagros Mountains. *The First Steps of Animal Domestication: New Archaeological Approaches*, eds Vigne J-D, Peters J, Helmer D (Oxbow Books, Oxford).
- Arbuckle BS (2013) The late adoption of cattle and pig husbandry in Neolithic Central Turkey. *J Archaeol Sci* 40(4):1805–1815.
- Helmer DL, Gourichon L, Monchot H, Peters J, Segui MS (2005) Identifying early domestic cattle from Pre-Pottery Neolithic sites on the Middle Euphrates using sexual dimorphism. *The First Steps of Animal Domestication*, eds Vigne J-D, Peters J, Helmer D (Oxbow Books, Oxford), pp 86–95.

16. Hongo H, Pearson J, Öksük B, Ilgezdi G (2009) The process of ungulate domestication at Çayönü, Southeastern Turkey: A multidisciplinary approach focusing on *Bos* sp. and *Cervus elaphus*. *Anthropozoologica* 44:63–73.
17. Vigne J-D, Guilaine J, Debue K, Haye L, Gérard P (2004) Early taming of the cat in Cyprus. *Science* 304(5668):259.
18. Linseele V, Van Neer W, Hendrickx S (2007) Evidence for early cat taming in Egypt. *J Archaeol Sci* 34(12):2081–2090.
19. Vigne J-D, et al. (2012) First wave of cultivators spread to Cyprus at least 10,600 years ago. *Proc Natl Acad Sci USA* 109(22):8445–8449.
20. Fuller DQ (2008) The spread of textile production and textile crops in India beyond the Harappan zone: An aspect of the emergence of craft specialization and systematic trade. *Linguistics, Archaeology and the Human Past Occasional Paper 3*, eds Osada T, Uesugi A (Indus Project, Research Institute for Humanity and Nature, Kyoto), pp 1–26.
21. Pokharia AK, et al. (2011) Archaeobotany and archaeology at Kanmer, a Harappan site in Kachchh, Gujarat: Evidence for adaptation in response to climatic variability. *Current Science (Bangalore)* 100(12):1833–1846.
22. Fuller DQ, et al. (2010) Consilience of genetics and archaeobotany in the entangled history of rice. *Archaeol Anthropol Sci* 2(2):115–131.
23. Fuller DQ (2011) Finding plant domestication in the Indian subcontinent. *Curr Anthropol* 52(54):S347–S362.
24. Meadow R (1993) Animal domestication in the Middle East: A revised view from the eastern Margin. *Harappan Civilization: A Recent Perspective*, ed Possehl GL (Oxford and IBH, New Delhi), pp 295–320.
25. Patel AK, Meadow R (1998) The exploitation of wild and domestic water buffalo in prehistoric northwestern South Asia. *Archaeozoology of the Near East III*, eds Buitenhuis H, Bartosiewicz L, Choyke AM (Centre for Archaeological Research and Consultancy, Rijksuniversiteit Groningen, Groningen), pp 180–199.
26. Lu H, et al. (2009) Earliest domestication of common millet (*Panicum miliaceum*) in East Asia extended to 10,000 years ago. *Proc Natl Acad Sci USA* 106(18):7367–7372.
27. Bettinger RL, Barton L, Morgan C (2010) The origins of food production in north China: A different kind of agricultural revolution. *Evolutionary Anthropology: Issues, News, and Reviews (Melb)* 19(1):9–21.
28. Zhao Z (2011) New archaeobotanical data for the study of the origins of agriculture in China. *Curr Anthropol* 52(54):S295–S306.
29. Yang X, et al. (2012) Early millet use in northern China. *Proc Natl Acad Sci USA* 109(10):3726–3730.
30. Fuller DQ (2011) Pathways to Asian civilizations: Tracing the origins and spread of rice and rice cultures. *Rice* 4:78–92.
31. Lee G-A, Crawford GW, Liu L, Sasaki Y, Chen X (2011) Archaeological soybean (*Glycine max*) in East Asia: Does size matter? *PLoS ONE* 6(11):e26720.
32. Fuller DQ, Qin L (2010) Declining oaks, increasing aristry, and cultivating rice: The environmental and social context of the emergence of farming in the Lower Yangtze Region. *Environ Archaeol* 15(2):139–159.
33. Saraswat KS, Sharma NK, Saini DC (1994) Plant economy by ancient Narhan (ca. 1,300 B.C.– 300/400 A.D.). *Excavations at Narhan (1984–1989)*, ed Singh P (Banaras Hindu Univ, Varanasi), pp 255–346.
34. Fuller DQ (2012) New archaeobotanical information on plant domestication from macro-remains: Tracking the evolution of domestication syndrome traits. *Biodiversity in Agriculture. Domestication, Evolution, and Sustainability*, eds Gepts P, et al. (Cambridge Univ Press, Cambridge), pp 110–135.
35. Cucchi T, Hulme-Beaman A, Yuan J, Dobney K (2011) Early Neolithic pig domestication at Jiahu, Henan Province, China: Clues from molar shape analyses using geometric morphometric approaches. *J Archaeol Sci* 38(1):11–22.
36. Flad RK, Yuan J, Li S (2007) Zooarchaeological evidence for animal domestication in Northwest China. *Late Quaternary Climate Change and Human Adaptation in Arid China, Developments in Quaternary Science, Vol. 9* eds Madsen DB, Chen F, Gao X, (Elsevier, Amsterdam), pp 163–199.
37. Zhang S, Gao H (1999) Study and observation on unearthed fabrics of the relics in the Qingtai village of Yingyang city. *Zhongyuan Wenwu* 1999(3):10–16. Chinese.
38. Good I (2011) Strands of connectivity: Assessing the evidence for long distance exchange of silk in later prehistoric Eurasia. *Interweaving Worlds. Systematic Interactions in Eurasia, 7th to the 1st Millennia BC*, eds Wilkinson TC, Sherratt S, Bennet J (Oxbow Books, Oxford), pp 218–230.
39. Meyer MC, et al. (2009) Holocene glacier fluctuations and migration of Neolithic yak pastoralists into the high valleys of northwest Bhutan. *Quat Sci Rev* 28(13):1217–1237.
40. Benecke N, von den Driesch A (2003) Horse exploitation in the Kazakl Steppes during the Eneolithic and Bronze Age. *Prehistoric Steppe Adaptation and the Horse*, eds Levine MA, Renfrew C, Boyle KV (McDonald Institute Monographs, Univ of Cambridge, Cambridge), pp 69–82.
41. Ludwig A, et al. (2009) Coat color variation at the beginning of horse domestication. *Science* 324(5926):485.
42. Outram AK, et al. (2009) The earliest horse harnessing and milking. *Science* 323(5919):1332–1335.
43. Anthony DW (2009) *The Horse, the Wheel, and Language: How Bronze-Age Riders from the Eurasian Steppes Shaped the Modern World* (Princeton Univ Press, Princeton).
44. Olsen SJ (1988) The camel in ancient China and an osteology of the camel. *Proc Acad Nat Sci Philadelphia* 140(11):22–23.
45. Kohl PL (2007) *The Making of Bronze Age Eurasia* (Cambridge Univ Press, Cambridge).
46. Meadow R, Patel AK (2001) From Mehrgarh to Harappa and Dholavira: Prehistoric pastoralism in North-Western South Asia through the Harappan Period. *Indian Archaeology in Retrospect*, eds Settar S, Korisettar R (Manohar, New Delhi), Vol Protohistory, pp 391–408.
47. Luff R (2000) Ducks. *Cambridge World History of Food*, eds Kiple KF, Ornelas KC (Cambridge University Press, Cambridge), pp 517–524.
48. Museum ZC (1979) The excavation of the Mound Tomb at Guoyuan of Fushan, Jurong county, Jiangsu province. *Kaogu [Archaeology]* 1979(2):113.
49. Fuller DQ (2006) Agricultural origins and frontiers in South Asia: A working synthesis. *J World Prehist* 20(1):1–86.
50. Deng H, Yuan J, Song GD, Wang CS, Masaki E (2013) The re-examination of the domestic chicken in Ancient China. *Kaogu* 2013(6):83–96.
51. Peters J (1998) *Römische Tierhaltung und Tierzucht: Eine Synthese aus Archäozoologischer Untersuchung und Schriftlich-Bildlicher Überlieferung [Roman Animal Keeping and Breeding: A Synthesis Based on Zooarchaeological Analysis and the Written and Pictorial Record]*. German (Passauer Universitäts-schriften zur Archäologie, Rahden, Germany).
52. Denham TP, et al. (2003) Origins of agriculture at Kuk Swamp in the highlands of New Guinea. *Science* 301(5630):189–193.
53. Haberle SG, Lentfer C, O'Donnell S, Denham T (2012) The palaeoenvironments of Kuk Swamp from the beginnings of agriculture in the highlands of Papua New Guinea. *Quat Int* 249:129–139.
54. Perrier X, et al. (2011) Multidisciplinary perspectives on banana (*Musa* spp.) domestication. *Proc Natl Acad Sci USA* 108(28):11311–11318.
55. Terral JF, et al. (2012) Insights into the historical biogeography of the date palm (*Phoenix dactylifera* L.) using geometric morphometry of modern and ancient seeds. *J Biogeogr* 39(5):929–941.
56. Boivin N, Fuller DQ (2009) Shell middens, ships and seeds: Exploring coastal subsistence, maritime trade and the dispersal of domesticates in and around the ancient Arabian Peninsula. *J World Prehist* 22(2):113–180.
57. Fuller DQ, Hildebrand L (2013) Domesticating plants in Africa. *The Oxford Handbook of African Archaeology*, eds Mitchell P, Lane P (Oxford Univ Press, Oxford), pp 507–525.
58. Manning K, Pelling R, Higham T, Schwenniger J-L, Fuller DQ (2011) 4500-Year old domesticated pearl millet (*Pennisetum glaucum*) from the Tilemsi Valley, Mali: New insights into an alternative cereal domestication pathway. *J Archaeol Sci* 38(2):312–322.
59. D'Andrea AC, Kahlheber S, Logan AL, Watson DJ (2007) Early domesticated cowpea (*Vigna unguiculata*) from Central Ghana. *Antiquity* 81(313):686–698.
60. Murray S (2007) Identifying African rice domestication in the middle Niger Delta (Mali). *Fields of Change: Progress in African Archaeobotany*, ed Cappers R (Barkhuis, Groningen), pp 53–62.
61. Gautier A (2001) The Early to Late Neolithic archaeofaunas from Nabta and Bir Kiseiba. *Holocene Settlement of the Egyptian Sahara. Playa*, eds Wendorf F, Schild R (Kluwer/Plenum, New York), *The Archaeology of Nabta*, pp 609–635.
62. Schild R, Wendorf F (2001) Geoarchaeology of the Holocene climatic optimum at Nabta playa, Southwestern desert, Egypt. *Geoarchaeology* 16(1):7–28.
63. Boessneck J, von den Driesch A, Ziegler R (1989) Die Tierreste von Maadi und Wadi Digla. *Maadi III*, eds Rizkana I, Seeher J (von Zabern, Mainz), pp 87–128.
64. Gautier A (1984) Archaeozoology of the Bir Kiseiba region, Eastern Sahara. *Cattle-Keepers of the Eastern Sahara: The Neolithic of Bir Kiseiba*, ed Close AE (SMU Dallas, Department of Anthropology, Dallas, TX), pp 49–72.
65. Chenal-Vélarde I (1998) Les premières traces de boeuf domestique en Afrique du Nord: Etat de la recherche centré sur les données archéozoologiques. *Archaeozoologia* 9(1–2):11–40.
66. Gautier A (1987) Prehistoric men and cattle in North Africa: A dearth of data and a surfeit of models. *Prehistory of Arid North Africa. Essays in Honor of Fred Wendorf*, ed Close AE (SMU Press, Dallas), pp 163–187.
67. Gautier A (2002) The evidence for the earliest livestock in North Africa: Or adventures with large bovines, ovicaprids, dogs and pigs. *Droughts, Food and Culture: Ecological Change and Food Security in Africa's Later Prehistory*, ed Hassan FA (Kluwer Academic/Plenum, New York), pp 195–207.
68. Linseele V (2013) Early stock keeping in northeastern Africa: Near Eastern influences and local developments. *Neolithisation of Northeastern Africa. Studies in Early Near Eastern Production, Subsistence, and Environment*, ed Shirai N (Ex oriente, Berlin), pp 97–108.
69. MacDonald KC (2000) The origins of African livestock: Indigenous or imported. *The Origins and Development of African Livestock: Archaeology, Genetics, Linguistics and Ethnography*, eds Blench RM, MacDonald KC (UCL Press, London), pp 2–17.
70. Peters J (1986) A revision of the faunal remains from two Central Sudanese sites: Khartoum Hospital and Esh Shaheinab. *Mélanges Publiés à l'Occasion du 5e Congrès International d'Archéozoologie, Août 1986*, (La Pensée Sauvage Editions, Grenoble, France), pp 11–33.
71. Cattani M, Bokonyi S (2002) Ash-Shumah: An early Holocene settlement of desert hunters and mangrove foragers in the Yemeni Tihamah. *Essays on the Late Prehistory of the Arabian Peninsula*, eds Cleuziou S, Tosi M, Zarins J (Istituto Italiano per l'Africa e l'Oriente, Rome), pp 31–53.
72. Rossel S, et al. (2008) Domestication of the donkey: Timing, processes, and indicators. *Proc Natl Acad Sci USA* 105(10):3715–3720.

73. Marshall F, Weissbrod L (2011) Domestication processes and morphological change. *Curr Anthropol* 52(54):S397–S413.
74. Kimura B, et al. (2011) Ancient DNA from Nubian and Somali wild ass provides insights into donkey ancestry and domestication. *Proc Biol Sci* 278(1702):50–57.
75. Marshall F, Asa C (2013) A study of African wild ass behavior provides insights into conservation issues, domestication processes and archaeological interpretation. *J Archaeol Method Theory* 20(3):479–494.
76. Shackelford L, Marshall F, Peters J (2013) Identifying donkey domestication through changes in cross-sectional geometry of long bones. *J Archaeol Sci* 40(12):4170–4179.
77. Uerpmann HP (2008) Animal Domestication. *Encyclopedia of Archaeology*, ed Pearsall DM (Elsevier, Amsterdam), pp 434–445.
78. Beech M, Mashkour M, Huelms M, Zazzo A (2009) Prehistoric camels in south-eastern Arabia: The discovery of a new site in Abu Dhabi's Western Region, United Arab Emirates. *Proceedings of the Seminar for Arabian Studies*, (JSTOR) 39(2009):17–30.
79. Driesch A, Obermaier H (2007) The hunt for wild dromedaries during the 3rd and 2nd millennia cal BC on the United Arab Emirates coast. Camel bone finds from the excavation at Al Sufouh 2, Dubai, UAE. *Skeletal Series and Their Socio-Economic Context*, eds Grupe G, Peters J (Rahden/Westf, Leidorf), Vol Documenta Archaeobiologiae, pp 133–167.
80. Kinne J, Wani NA, Wernery U, Peters J, Knosp C (2010) Is there a two-humped stage in the embryonic development of the dromedary? *Anat Histol Embryol* 39(5):479–480.
81. Peters J (1997) [The dromedary: Ancestry, history of domestication and medical treatment in early historic times]. *Tierarztl Prax Ausg G Grosstiere Nutztiere* 25(6):559–565. German.
82. Uerpmann H, Uerpmann M (2002) The appearance of the domestic camel in south-east Arabia. *Journal of Oman Studies* 12:235–260.
83. MacDonald KC (1992) The domestic chicken (*Gallus gallus*) in Sub-Saharan Africa: A background to its introduction and its osteological differentiation from indigenous fowls (*Nunudinae* and *Fracolinus* sp.). *J Archaeol Sci* 19:303–318.
84. MacDonald KC, MacDonald RH (2000) The origins of domesticated animals in arid West Africa. *The Origins and Development of Livestock in Africa*, eds Blench RM, MacDonald KC (UCL Press, London), pp 127–162.
85. Töröl L (1987) The historical background: Meroe, North and South. *Meroitistische Forschungen 1980*, ed Hintze F (Akademie, Berlin), pp 139–229.
86. Smith BD (2006) Eastern North America as an independent center of plant domestication. *Proc Natl Acad Sci USA* 103(33):12223–12228.
87. Smith BD, Yarnell RA (2009) Initial formation of an indigenous crop complex in eastern North America at 3800 B.P. *Proc Natl Acad Sci USA* 106(16):6561–6566.
88. Smith BD (1997) The initial domestication of *Cucurbita pepo* in the Americas 10,000 years ago. *Science* 276(5314):932–934.
89. Piperno DR, Ranere AJ, Holst I, Iriarte J, Dickau R (2009) Starch grain and phytolith evidence for early ninth millennium B.P. maize from the Central Balsas River Valley, Mexico. *Proc Natl Acad Sci USA* 106(13):5019–5024.
90. Ranere AJ, Piperno DR, Holst I, Dickau R, Iriarte J (2009) The cultural and chronological context of early Holocene maize and squash domestication in the Central Balsas River Valley, Mexico. *Proc Natl Acad Sci USA* 106(13):5014–5018.
91. Callen EO (1967) The first new world cereal. *Am Antiq* 32(4):535–538.
92. Kaplan L, Lynch TF (1999) Phaseolus (Fabaceae) in archaeology: AMS. *Econ Bot* 53(3):261–272.
93. Smith CE (1967) Plant remains. *The Prehistory of the Tehuacan Valley*, ed Biers DS (Univ of Texas Press, Austin), Vol 1, Environment and Subsistence, pp 220–255.
94. Kraft KH, et al. (2014) Multiple lines of evidence for the origin of domesticated chili pepper, *Capsicum annum*, in Mexico. *Proc Natl Acad Sci USA*, 10.1073/pnas.1308933111.
95. Thornton EK, et al. (2012) Earliest Mexican Turkeys (*Meleagris gallopavo*) in the Maya Region: Implications for pre-Hispanic animal trade and the timing of turkey domestication. *PLoS ONE* 7(8):e42630.
96. Perry L, et al. (2007) Starch fossils and the domestication and dispersal of chili peppers (*Capsicum* spp. L.) in the Americas. *Science* 315(5814):986–988.
97. Dillehay TD, Rossen J, Andres TC, Williams DE (2007) Pre-ceramic adoption of peanut, squash, and cotton in northern Peru. *Science* 316(5833):1890–1893.
98. Dillehay TD, et al. (2010) Early Holocene coca chewing in northern Peru. *Antiquity* 84(326):939–953.
99. Piperno DR, Stothert KE (2003) Phytolith evidence for early Holocene *Cucurbita* domestication in southwest Ecuador. *Science* 299(5609):1054–1057.
100. Ezell KC, Pearsall DM, Zeidler JA (2006) Root and tuber phytoliths and starch grains document manioc (*Manihot esculenta*) arrowroot (*Maranta arundinacea*) and Ilerén (*Calathea* sp.) at the real alto site Ecuador. *Econ Bot* 60(2):103–120.
101. Piperno DR, Dillehay TD (2008) Starch grains on human teeth reveal early broad crop diet in northern Peru. *Proc Natl Acad Sci USA* 105(50):19622–19627.
102. Piperno DR, Ranere AJ, Holst I, Hansell P (2000) Starch grains reveal early root crop horticulture in the Panamanian tropical forest. *Nature* 407(6806):894–897.
103. Dickau R, Ranere AJ, Cooke RG (2007) Starch grain evidence for the pre-ceramic dispersals of maize and root crops into tropical dry and humid forests of Panama. *Proc Natl Acad Sci USA* 104(9):3651–3656.
104. Solis RS, Haas J, Creamer W (2001) Dating Caral, a pre-ceramic site in the Supe Valley on the central coast of Peru. *Science* 292(5517):723–726.
105. Hawkes JG (1990) *The Potato: Evolution, Biodiversity and Genetic Resources* (John Wiley and Sons, New York).
106. Bruno MC, Whitehead WT (2003) *Chenopodium Cultivation and Formative Period Agriculture at Chiripa* (Latin American Antiquity, Bolivia), pp 339–355.
107. Piperno DR (2011) The origins of plant cultivation and domestication in the New World tropics. *Curr Anthropol* 52(54):S453–S470.
108. Mengoni-Goñalons GL, Yacobaccio HD (2006) The domestication of South American camelids. A view from the South-Central Andes. *Documenting Domestication: New Genetic and Archaeological Paradigms*, eds Zeder M, Bradley DG, Emshwiller E, Smith BD (Univ of California Press, Berkeley), pp 228–244.
109. Mengoni-Goñalons GL (2008) Camelids in ancient Andean societies: A review of the zooarchaeological evidence. *Quat Int* 185(1):59–68.
110. Stahl PW (2008) Animal Domestication in South America. *Handbook of South American Archaeology*, eds Silverman H, Isbell WH (Springer, New York), pp 121–130.
111. Dunnum JL, Salazar-Bravo J (2010) Molecular systematics, taxonomy and biogeography of the genus *Cavia* (Rodentia: Caviidae). *J Zoological Syst Evol Res* 48(4):376–388.
112. Stahl PW (2005) An exploratory osteological study of the muscovy duck (*Cairina moschata*) (Aves: Anatidae) with implications for neotropical archaeology. *J Archaeol Sci* 32(6):915–929.
113. Stahl PW, Muse MC, Delgado-Espinoza F (2006) New evidence for pre-Columbian Muscovy Duck *Cairina moschata* from Ecuador. *Ibis* 148(4):657–663.
114. Larson G, Burger J (2013) A population genetics view of animal domestication. *Trends Genet* 29(4):197–205.
